# Supplementary material
Source: PubMed Central journal article supplement (PMC8881796)
Supplement: NIHMS1777662-supplement-Permission_from_publisher_to_upload_final_published_verison.pdf [file NIHMS1777662-supplement-Permission_from_publisher_to_upload_final_published_verison.pdf]

## Andrea Lynch

---

**From:** Efthimis Kragaris <journals@iiar-anticancer.org>  
**Sent:** Friday, February 4, 2022 12:28 AM  
**To:** Andrea Lynch  
**Subject:** Re: Question about files for PMC processing

**Follow Up Flag:** Follow up  
**Flag Status:** Flagged

Dear Andrea,

thank you for your message.

You may deposit the final published version.

Kind regards,

Efthimis Kragaris  
Editorial assistant

International Institute of Anticancer Research (IIAR)  
Editorial Office of ANTICANCER RESEARCH, IN VIVO,  
CANCER GENOMICS & PROTEOMICS and CANCER DIAGNOSIS & PROGNOSIS  
1st km Kapandritiou-Kalamou Road  
P.O. Box 22, GR-19014 Kapandriti, Attiki, Greece

Tel: +30-22950-52945  
Tel/Fax: +30-22950-53389  
e-mail: [iiar@iiar-anticancer.org](mailto:iiar@iiar-anticancer.org)

On 4/2/22 4:46 AM, Andrea Lynch wrote:

To Whom It May Concern,

I would love any help you can provide. Do you happen to have the manuscript and related files for the below paper? I need to get it processed for PMC via the NIHMS System, but don't have the files handy.

Lindblom EK, Hui S, Brooks J, Dasu A, Kujawski M, Toma-Dasu I. Radiation-induced Vascular Damage and the Impact on the Treatment Outcome of Stereotactic Body Radiotherapy. *Anticancer Res.* 2019 Jun;39(6):2721-2727. doi: 10.21873/anticancer.13398. PMID: 31177107.

Or, if it has been published for over two years, would you be willing to allow me to deposit the final, published version?

Thanks in advance.

With best regards,  
Andrea

---

**Andrea Lynch, MLIS**(*She/Her/Hers*)  
Scholarly Communication Librarian | Division of Library Services | Center for Informatics

City of Hope | [Lee Graff Medical & Scientific Library](#), 1500 East Duarte Road | Duarte, CA 91010-3000  
Tel: 626-218-2520 | Internal: 82520 | Email: [alynch@coh.org](mailto:alynch@coh.org) | ORCID: [orcid.org/0000-0002-1631-7171](https://orcid.org/0000-0002-1631-7171)

You can now use OpenAthens to login and access Library resources remotely with your City of Hope credentials. For more information, explore the [OpenAthens Guide](#).

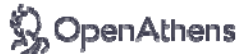

*I'm checking email less frequently to improve my focus. If you need me immediately, please [chat with me on Teams](#).*

Follow City of Hope: [Facebook](#) | [Twitter](#) | [Instagram](#) | [LinkedIn](#) | [YouTube](#) | [Blog](#)

---

-----  
-SECURITY/CONFIDENTIALITY WARNING-

This message and any attachments are intended solely for the individual or entity to which they are addressed. This communication may contain information that is privileged, confidential, or exempt from disclosure under applicable law (e.g., personal health information, research data, financial information). Because this e-mail has been sent without encryption, individuals other than the intended recipient may be able to view the information, forward it to others or tamper with the information without the knowledge or consent of the sender. If you are not the intended recipient, or the employee or person responsible for delivering the message to the intended recipient, any dissemination, distribution or copying of the communication is strictly prohibited. If you received the communication in error, please notify the sender immediately by replying to this message and deleting the message and any accompanying files from your system. If, due to the security risks, you do not wish to receive further communications via e-mail, please reply to this message and inform the sender that you do not wish to receive further e-mail from the sender. (LCP301)

-----
